# Supplementary material for: The Family Fabaceae in northeastern Mexico (Subfamily Caesalpinioideae, Mimosoideae Clade, Tribes Mimoseae, Acacieae, and Ingeae)
Source: Preprints.org preprint supplement (doi:10.20944/preprints202401.0127.v1), 2024-01-03
Supplement: Supplementary file 1 [file supplementary]

## Sheet: SPECIES
	Bajío	Novo Gal	Des Son	Valle de Mex	Durango	NE Mex	Texas	Calif.	Tabasco	Q.Roo	Chiapas	Yucatán
Abarema zollerana	0	0	0	0	0	0	0	0	0	0	1	0
Acacia elongata	0	0	0	0	1	0	0	0	0	0	0	0
Acacia longifolia	0	0	0	0	0	0	0	1	0	0	0	0
Acacia melanoxylon	0	0	0	0	0	0	0	1	0	0	0	0
Acacia retinoides	0	0	0	0	0	0	0	1	0	0	0	0
Acacia salicina	1	0	0	0	0	1	0	0	0	0	0	0
Acacia willardiana	0	0	1	0	0	0	0	0	0	0	0	0
Acaciella angustissima	1	1	1	1	1	1	1	0	1	1	1	1
Acaciella barrancana	0	0	0	0	1	0	0	0	0	0	0	0
Acaciella goldmanii	0	0	1	0	0	0	0	0	0	0	0	0
Acaciella hartwegii	1	1	0	0	1	1	0	0	0	0	0	0
Acaciella mcmurphy	0	0	1	0	0	0	0	0	0	0	0	0
Acaciella rosei	0	1	0	0	1	0	0	0	0	0	0	0
Acaciella tequilana	1	1	1	0	1	1	0	0	0	0	0	0
Acaciella villosa	0	1	0	0	0	0	0	0	0	0	1	0
Albizia adinocephala	0	0	0	0	0	0	0	0	0	0	1	0
Albizia guachapele	0	0	0	0	0	0	0	0	0	0	1	0
Albizia julibrissin	0	0	0	0	0	0	1	0	0	0	0	0
Albizia lebbeck	0	1	0	0	0	1	0	0	1	1	1	0
Albizia distachya	0	0	0	0	0	0	0	1	0	0	0	0
Albizia niopoides	0	0	0	0	0	0	0	0	1	0	1	1
Albizia occidentalis	1	1	1	0	0	0	0	0	0	0	0	0
Albizia plurijuga	0	1	0	0	0	0	0	0	0	0	1	0
Albizia saman	0	0	0	0	0	0	0	0	1	0	0	0
Albizia sinaloensis	0	0	1	0	0	0	0	0	0	0	0	0
Albizia tomentosa	1	1	0	0	0	0	0	0	1	1	1	1
Ballizia leucocalyx	0	0	0	0	0	0	0	0	1	0	0	0
Calliandra belizensis	0	0	0	0	0	0	0	0	0	1	0	1
Calliandra biflora	0	0	0	0	1	1	1	0	0	0	0	0
Calliandra bijuga	0	1	0	0	0	0	0	0	0	0	0	0
Calliandra brandegeei	0	0	1	0	0	0	0	0	0	0	0	0
Calliandra caeciliae	0	1	0	0	0	0	0	0	0	0	1	1
Calliandra californica	0	0	1	0	0	0	0	0	0	0	0	0
Calliandra calothyrsus	0	1	0	0	0	0	0	0	0	0	0	1
Calliandra caulescens	0	0	0	0	0	0	0	0	0	0	1	0
Calliandra conferta	0	0	0	0	0	1	1	0	0	0	0	0
Calliandra cumingii	0	0	0	0	0	0	0	0	0	0	1	0
Calliandra emarginata	0	1	0	0	0	0	0	0	0	0	0	0
Calliandra eriophylla	1	1	1	0	1	1	0	1	0	0	1	0
Calliandra grandiflora	1	1	0	1	1	0	0	0	0	0	1	0
Calliandra herbacea	0	0	0	0	0	0	1	0	0	0	0	0
Calliandra hirsuta	0	1	0	0	0	0	0	0	0	0	1	0
Calliandra houstoniana	1	1	0	0	1	1	0	0	1	1	1	1
Calliandra humilis	0	1	1	1	1	1	1	0	0	0	0	0
Calliandra juzepczukii	0	0	0	0	0	0	0	0	0	0	1	0
Calliandra laevis	0	1	0	0	0	0	0	0	0	0	0	0
Calliandra magdalenae	0	0	0	0	0	0	0	0	0	0	1	0
Calliandra obesifolia	0	0	0	0	0	0	0	0	1	0	0	0
Calliandra palmeri	0	1	0	0	0	0	0	0	0	0	0	0
Calliandra peninsularis	0	0	1	0	0	0	0	0	0	0	0	0
Calliandra pilocarpa	0	0	1	0	0	0	0	0	0	0	0	0
Calliandra rosei	0	0	1	0	0	0	0	0	0	0	0	0
Calliandra rubescens	0	0	0	0	0	0	0	0	0	0	1	0
Calliandra schottii	0	0	1	0	0	0	0	0	0	0	0	0
Calliandra tergemina	0	0	0	0	0	1	0	0	1	0	1	1
Calliandra trinervia	0	0	0	0	0	0	0	0	0	0	1	0
Calliandropsis nervosa	1	0	0	0	0	0	0	0	0	0	0	0
Chloroleucon mangense	0	1	0	0	0	1	0	0	0	1	1	1
Cojoba arborea	1	0	0	0	0	1	0	0	1	0	1	1
Cojoba escuintlensis	0	0	0	0	0	0	0	0	0	0	1	0
Cojoba graciliflora	0	0	0	0	0	0	0	0	0	1	1	1
Cojoba matudae	0	0	0	0	0	0	0	0	0	0	1	0
Cojoba recordii	0	0	0	0	0	0	0	0	1	0	1	0
Desmanthus acuminatus	0	0	0	0	0	0	1	0	0	0	0	0
Desmanthus bicornutus	0	1	1	0	0	0	0	0	0	0	0	0
Desmanthus brevipes	0	0	0	0	0	0	1	0	0	0	0	0
Desmanthus cooleyi	0	0	0	0	0	1	1	0	0	0	0	0
Desmanthus covillei	0	0	1	0	0	0	0	0	0	0	0	0
Desmanthus fruticosus	0	0	1	0	0	0	0	0	0	0	0	0
Desmanthus glandulosus	0	0	0	0	0	1	0	0	0	0	0	0
Desmanthus illinoensis	0	0	0	0	0	0	1	0	0	0	0	0
Desmanthus interior	1	1	0	0	0	0	0	0	0	0	0	0
Desmanthus leptophyllus	0	0	0	0	0	0	0	0	0	0	0	1
Desmanthus leptolobus	0	0	0	0	0	0	1	0	0	0	0	0
Desmanthus obtusus	0	0	0	0	0	0	1	0	0	0	0	0
Desmanthus oligospermus	0	0	1	0	0	0	0	0	0	0	0	0
Desmanthus painteri	1	0	0	0	0	1	0	0	0	0	0	0
Desmanthus palmeri	0	0	1	0	0	0	0	0	0	0	0	0
Desmanthus paspalaceus	0	0	0	0	0	1	0	0	0	0	0	1
Desmanthus pringlei	0	0	0	0	0	1	0	0	0	0	0	0
Desmanthus pubescens	0	0	0	0	0	0	0	0	0	0	0	1
Desmanthus pumilus	1	1	0	1	0	0	0	0	0	0	0	0
Desmanthus reticulatus	0	0	0	0	0	0	1	0	0	0	0	0
Desmanthus subulatus	0	0	1	0	0	0	0	0	0	0	0	0
Desmanthus velutinus	0	0	0	0	0	1	1	0	0	0	0	0
Desmanthus virgatus	1	1	0	0	0	1	1	0	1	0	1	1
Ebenopsis ebano	0	0	0	0	0	1	1	0	0	0	0	1
Entada patnes	0	1	0	0	0	0	0	0	0	0	0	0
Entada polystachya	0	1	0	0	0	0	0	0	1	0	1	0
Entada rheedii	0	0	0	0	0	0	0	0	0	0	1	0
Enterolobium cyclocarpum	1	1	1	0	1	1	0	0	1	1	1	1
Enterolobium schomburgkii	0	0	0	0	0	0	0	0	1	0	1	0
Havardia albicans	0	0	0	0	0	0	0	0	1	1	1	1
Havardia pallens	1	0	0	0	1	1	1	0	0	0	1	1
Inga affinis	0	0	0	0	0	0	0	0	0	0	0	1
Inga andersonii	0	1	0	0	0	0	0	0	0	0	0	0
Inga belizensis	0	0	0	0	0	0	0	0	0	0	1	0
Inga brevipedicellata	0	0	0	0	0	0	0	0	0	0	1	0
Inga calderonii	0	0	0	0	0	0	0	0	0	0	1	0
Inga eriocarpa	0	1	0	0	0	0	0	0	0	0	0	0
Inga hintonii	1	1	0	0	0	0	0	0	0	0	1	0
Inga huastecana	1	0	0	0	0	0	0	0	0	0	0	0
Inga jinicuil	0	0	0	0	0	1	0	0	1	0	1	0
Inga laurina	0	1	0	0	0	0	0	0	1	0	0	0
Inga micheliana	0	0	0	0	0	0	0	0	0	0	1	0
Inga multijuga	0	0	0	0	0	0	0	0	0	0	1	0
Inga oerstediana	0	0	0	0	0	0	0	0	0	0	1	0
Inga pinetorum	0	0	0	0	0	0	0	0	1	0	1	0
Inga punctata	0	0	0	0	0	0	0	0	1	0	1	0
Inga quaternata	0	0	0	0	0	0	0	0	0	0	1	0
Inga ruiziana	0	0	0	0	0	0	0	0	0	0	1	0
Inga sapindoides	0	0	0	0	0	0	0	0	1	0	1	0
Inga schiedeana	0	0	0	0	0	0	0	0	0	0	1	0
Inga tuerckheimii	1	0	0	0	0	0	0	0	0	0	0	0
Inga vera	1	0	0	0	1	1	0	0	1	1	1	1
Leucaena brandegeei	0	0	1	0	0	0	0	0	0	0	0	0
Leucaena cuspidata	1	0	0	0	0	0	0	0	0	0	0	0
Leucaena diversifolia	0	0	0	0	0	0	0	0	0	0	1	0
Leucaena esculenta	0	1	0	0	0	1	0	0	0	0	1	0
Leucaena greggii	0	0	0	0	0	1	0	0	0	0	0	0
Leucaena lanceolata	0	1	1	0	1	0	0	0	0	0	1	0
Leucaena leucocephala	0	1	0	0	0	1	1	0	0	0	1	1
Leucaena macrophylla	1	1	0	0	0	0	0	0	0	0	0	0
Leucaena microcarpa	0	0	1	0	0	0	0	0	0	0	0	0
Leucaena pallida	1	0	0	0	0	0	0	0	0	0	0	0
Leucaena palmeri	0	0	1	0	0	0	0	0	0	0	0	0
Leucaena pulverulenta	1	0	0	0	0	1	1	0	0	0	0	0
Leucaena retusa	0	0	0	0	0	1	1	0	0	0	0	0
Leucaena shannonii	0	0	0	0	0	0	0	0	0	0	1	1
Lysiloma acapulcense	1	1	0	0	1	1	0	0	1	0	1	1
Lysiloma aurita	0	0	0	0	0	0	0	0	1	0	1	0
Lysiloma candida	0	0	1	0	0	0	0	0	0	0	0	0
Lysiloma divaricata	0	0	1	0	0	1	0	0	0	0	1	0
Lysiloma latisiliqua	0	0	0	0	0	0	0	0	1	1	0	1
Lysiloma microphylla	1	1	0	0	0	0	0	0	1	0	0	0
Lysiloma tergemina	0	1	0	0	0	0	0	0	0	0	0	0
Lysiloma thornberi	0	0	1	0	0	0	0	0	0	0	0	0
Lysiloma watsonii	0	0	1	0	0	0	0	0	0	0	0	0
Mariosousa coulteri	1	0	1	0	1	1	0	0	0	0	1	0
Mariosousa dolicostahya	0	0	0	0	0	0	0	0	0	0	0	1
Mariosous durangensis	0	0	0	0	0	1	0	0	0	0	0	0
Mariosousa acatelnsis	0	1	0	0	0	0	0	0	0	0	0	0
Mariosousa mammifera	1	0	0	0	0	1	0	0	0	0	0	0
Mariosousa millefolia	0	0	1	0	0	0	0	0	0	0	0	0
Mimosa acantholoba	0	1	0	0	0	0	0	0	0	0	1	0
Mimosa aculeaticarpa	1	1	0	1	1	1	0	0	0	0	1	0
Mimosa adenantheroides	0	1	0	0	0	0	0	0	0	0	1	0
Mimosa affinis	0	0	0	0	0	0	0	0	0	0	0	1
Mimosa albida	1	1	0	1	1	1	0	0	1	1	1	1
Mimosa accedens	0	1	0	0	0	0	0	0	0	0	0	0
Mimosa arenosa	0	1	0	0	0	0	0	0	0	0	0	0
Mimosa antioquensis	0	0	0	0	0	0	0	0	0	0	1	0
Mimosa aspera	0	1	0	0	0	0	0	0	0	0	0	0
Mimosa bahamensis	0	0	0	0	0	0	0	0	1	1	0	1
Mimosa barrancana	0	0	0	0	1	0	0	0	0	0	0	0
Mimosa benthamii	1	1	0	0	0	0	0	0	0	0	0	0
Mimosa biuncifera	0	0	1	0	1	0	1	0	0	0	0	0
Mimosa borealis	0	0	0	0	0	0	1	0	0	0	0	0
Mimosa brandegeei	0	1	1	0	0	0	0	0	0	0	0	0
Mimosa calderonii	0	0	0	0	0	0	0	0	1	0	1	0
Mimosa camporum	0	0	0	0	0	0	0	0	1	0	1	0
Mimosa corynadenia	0	0	0	0	0	0	0	0	0	0	1	0
Mimosa costenya	0	1	0	0	0	0	0	0	0	0	0	0
Mimosa depauperata	1	0	0	1	0	0	0	0	0	0	0	0
Mimosa diplotricha	0	1	0	0	0	0	0	0	0	0	0	0
Mimosa dormiens	0	0	0	0	0	0	0	0	1	0	0	0
Mimosa dysocarpa	0	1	1	0	1	0	1	0	0	0	0	0
Mimosa distachya	0	0	0	0	0	0	0	0	0	0	0	1
Mimosa emorayana	0	0	0	0	1	1	1	0	0	0	0	0
Mimosa ervendbergii	0	0	0	0	0	0	0	0	1	0	1	0
Mimosa galeotti	1	1	0	0	1	0	0	0	0	0	0	0
Mimosa goldmanii	0	0	0	0	0	0	0	0	0	0	1	0
Mimosa grahamii	0	0	1	0	0	0	0	0	0	0	0	0
Mimosa guaranitica	0	0	0	0	0	1	0	0	0	0	0	0
Mimosa guatemalensis	0	1	0	0	0	0	0	0	0	0	0	1
Mimosa hondurana	0	0	0	0	0	0	0	0	0	0	1	0
Mimosa hystricina	0	0	0	0	0	0	1	0	0	0	0	0
Mimosa invisa	0	0	0	0	0	0	0	0	0	0	1	0
Mimosa lacerata	1	0	0	1	0	0	0	0	0	0	0	0
Mimosa langlassei	0	0	0	0	0	0	0	0	0	0	1	0
Mimosa latidens	0	0	0	0	0	1	1	0	0	0	0	0
Mimosa laxiflora	0	0	1	0	0	0	0	0	0	0	0	0
Mimosa leptocarpa	0	1	0	0	0	0	0	0	0	0	0	0
Mimosa leucaenoides	1	0	0	0	0	1	0	0	0	0	0	0
Mimosa malacophylla	0	0	0	0	0	1	1	0	0	0	0	0
Mimosa margaritae	0	0	1	0	0	0	0	0	0	0	0	0
Mimosa martin delcampoi	0	0	0	0	0	1	0	0	0	0	0	0
Mimosa maxonii	0	0	0	0	0	0	0	0	0	0	1	0
Mimosa mellii	0	0	0	0	0	0	0	0	0	0	1	0
Mimosa minutifolia	1	1	0	0	0	0	0	0	0	0	0	0
Mimosa monancistra	1	1	0	0	0	1	0	0	0	0	0	0
Mimosa monclovensis	0	0	0	0	0	1	0	0	0	0	0	0
Mimosa nelsoni	0	0	0	0	0	0	0	0	0	0	1	0
Mimosa nuttalli	0	0	0	0	0	0	1	0	0	0	0	0
Mimosa occidentalis	0	1	0	0	0	0	1	0	1	0	1	0
Mimosa oligacantha	0	0	0	0	0	0	0	0	0	0	0	1
Mimosa orthocarpa	0	1	0	0	0	0	0	0	0	0	0	1
Mimosa paucijuga	0	0	0	0	0	1	0	0	0	0	0	0
Mimosa paucisperma	0	0	0	0	0	0	0	0	0	0	1	0
Mimosa pigra	0	1	0	0	0	1	1	0	1	1	1	1
Mimosa platycarpa	0	0	0	0	0	0	0	0	0	0	1	0
Mimosa polyantha	0	1	0	0	1	0	0	0	0	0	1	0
Mimosa potosina	0	0	0	0	1	1	0	0	0	0	0	0
Mimosa pringlei	1	0	0	0	0	0	0	0	0	0	0	0
Mimosa psilocarpa	0	0	0	0	0	0	0	0	0	0	1	0
Mimosa pudica	0	1	0	0	0	1	0	0	1	1	1	1
Mimosa purpurascens	0	0	1	0	0	0	0	0	0	0	0	0
Mimosa quadrivalvis	0	1	0	0	0	0	0	0	1	0	1	0
Mimosa recordii	0	0	0	0	0	0	0	0	0	0	1	0
Mimosa rhodocarpa	1	0	0	0	0	0	0	0	0	0	1	0
Mimosa rhododactyla	0	0	0	0	1	0	0	0	0	0	0	0
Mimosa roemeriana	0	0	0	0	0	0	1	0	0	0	0	0
Mimosa rosei	0	1	0	0	0	0	0	0	0	0	0	0
Mimosa setuliseta	0	0	0	0	0	1	0	0	0	0	0	0
Mimosa sicyiocarpa	0	1	0	0	0	0	0	0	0	0	0	0
Mimosa similis	1	0	0	0	0	0	0	0	0	0	0	0
Mimosa sinaloensis	0	1	0	0	0	0	0	0	0	0	0	0
Mimosa skinneri	0	0	0	0	0	0	0	0	0	0	1	0
Mimosa somnians	0	1	0	0	0	0	0	0	1	0	1	1
Mimosa strigillosa	0	0	0	0	0	1	1	0	0	0	0	0
Mimosa tenuiflora	0	0	0	0	0	0	0	0	0	0	1	0
Mimosa tequilana	0	1	0	0	0	0	0	0	0	0	0	0
Mimosa texana	1	0	0	0	0	1	1	0	0	0	0	0
Mimosa unipinnata	0	0	0	0	0	1	0	0	0	0	0	0
Mimosa turneri	0	0	0	0	0	1	0	0	0	0	0	0
Mimosa ursina	0	0	0	0	0	0	0	0	1	0	0	0
Mimosa velloziana	0	0	0	0	0	0	0	0	1	0	1	0
Mimosa warnockii	0	0	0	0	0	0	1	0	0	0	0	0
Mimosa wherreyana	0	0	0	0	0	0	0	0	0	0	0	0
Mimosa xantii	0	1	1	0	0	0	0	0	0	0	0	0
Mimosa zacapana	0	0	0	0	0	0	0	0	0	0	1	0
Mimosa zygophylla	0	0	0	0	0	1	1	0	0	0	0	0
Neltuma articulata	0	0	1	0	0	0	0	0	0	0	0	0
Neltuma chilensis	0	0	0	0	0	1	0	0	0	0	0	0
Neltuma glandulosa	0	1	1	0	1	1	1	1	0	0	1	1
Neltuma laevigata	0	1	0	1	1	1	1	0	0	0	1	0
Neltuma mayana	0	0	0	0	0	0	0	0	0	0	0	1
Neltuma odorata	0	0	1	0	1	1	1	0	0	0	0	0
Neltuma palmeri	1	0	1	0	0	1	1	0	0	0	0	0
Neltuma velutina	0	0	1	0	0	0	0	1	0	0	0	0
Neptunia plena	0	0	0	0	0	0	1	0	0	0	1	1
Neptunia natans	0	1	0	0	0	0	0	0	0	0	0	1
Neptunia prostrata	0	0	0	0	0	1	0	0	1	0	0	0
Neptunia plena	0	1	1	0	0	0	1	0	1	0	0	0
Neptunia pubescens	1	1	0	0	0	1	1	0	1	0	1	0
Painteria elachistophylla	1	0	0	0	1	1	0	0	0	0	0	0
Painteria leptophylla	1	1	0	1	1	0	0	0	0	0	0	0
Painteria revoluta	1	0	0	0	0	0	0	0	0	0	0	0
Piptadenia constricta	0	1	0	0	0	0	0	0	0	0	0	0
Piptadenia flava	0	1	0	0	0	0	0	0	0	0	1	1
Piptadenia platycarpa	0	1	0	0	0	0	0	0	0	0	0	0
Piptadenia viridiflora	0	0	0	0	0	0	0	0	0	0	1	1
Pithecellobium albicaule	0	0	0	0	0	0	0	0	0	0	1	0
Pithecellobium halogenes	0	0	0	0	0	0	0	0	0	0	1	0
Pithecellobium brownii	0	0	0	0	0	0	0	0	0	1	0	0
Pithecellobium confine	0	0	1	0	0	0	0	0	0	0	0	0
Pithecellobium dulce	1	1	1	0	1	1	0	0	1	1	1	1
Pithecellobium furcatum	0	0	0	0	0	0	0	0	1	0	0	0
Pithecellobium hymenaeafolium	0	0	0	0	0	0	0	0	0	1	0	0
Pithecellobium insigne	1	0	0	0	0	0	0	0	1	0	1	0
Pithecellobium keyense	0	0	0	0	0	0	0	0	0	1	0	1
Pithecellobium lanceolatum	0	0	0	0	0	1	0	0	1	1	1	1
Pithecellobium macrandrium	0	0	0	0	0	0	0	0	1	0	1	0
Pithecellobium mexicanum	0	0	1	0	0	0	0	0	0	0	0	0
Pithecellobium oblongum	0	0	0	0	0	0	0	0	0	0	0	1
Pithecellobium pachypus	0	0	0	0	0	0	0	0	1	0	0	0
Pithecellobium saman	0	0	0	0	0	0	0	0	1	1	1	0
Pithecellobium seleri	0	0	0	0	0	0	0	0	0	0	0	1
Pithecellobium sonorae	0	0	1	0	0	0	0	0	0	0	0	0
Pithecellobium turneri	0	1	0	0	0	0	0	0	0	0	0	0
Pithecellobium undulatum	0	0	1	0	0	0	0	0	0	0	0	0
Pithecellobium unguis-cati	0	1	0	0	0	1	0	0	0	0	0	1
Pithecellobium winzerlingii	0	0	0	0	0	0	0	0	0	0	0	1
Samanea saman	0	0	0	0	0	1	0	0	0	0	0	0
Senegalia amabilis	1	0	0	0	0	0	0	0	0	0	0	0
Senegalia anisophylla	1	0	0	0	1	1	0	0	0	0	0	0
Senegalia berlandieri	1	0	0	0	1	1	1	0	0	0	0	0
Senegalia centralis	0	0	0	0	0	0	0	0	0	0	1	0
Senegalia crassifolia	0	0	0	0	1	1	0	0	0	0	0	0
Senegalia decurrens	0	0	0	0	0	0	0	1	0	0	0	0
Senegalia dolichostachya	0	0	0	0	0	0	0	0	0	1	0	0
Senegalia fusicarpa	1	0	0	0	0	0	0	0	0	0	0	0
Senegalia gaumeri	0	0	0	0	0	0	0	0	0	1	0	1
Senegalia glomerosa	0	1	0	0	0	0	0	0	1	1	1	0
Senegalia greggii	0	0	1	0	1	1	1	1	0	0	0	0
Senegalia hayesii	0	0	0	0	0	0	0	0	1	0	1	1
Senegalia macilenta	0	1	0	0	0	0	0	0	0	0	0	0
Senegalia micrantha	1	0	0	0	0	1	0	0	0	0	0	0
Senegalia mirandae	0	0	0	0	0	0	0	0	0	0	1	0
Senegalia picachensis	0	1	0	0	0	0	0	0	0	0	1	1
Senegalia polyphylla	0	0	0	0	0	0	0	0	0	0	0	1
Senegalia reniformis	1	0	0	0	0	0	0	0	0	0	0	0
Senegalia riparia	0	1	0	0	0	0	0	0	0	1	1	1
Senegalia roemeriana	0	0	0	0	0	1	1	0	0	0	0	0
Senegalia sororia	1	0	0	0	0	0	0	0	0	0	0	0
Senegalia tenuifolia	0	1	0	0	0	0	0	0	0	0	0	0
Senegalia wrightii	0	0	1	0	0	1	1	0	0	0	0	0
Sphinga acatlensis	0	1	0	0	1	0	0	0	0	0	0	0
Sphinga platyloba	0	1	0	0	0	0	0	0	1	1	1	1
Strombocarpa cinerascens	0	0	0	0	0	1	1	0	0	0	0	0
Strombocarpa pubescens	0	0	1	0	0	0	1	1	0	0	0	0
Vachellia brandegeana	0	0	1	0	0	0	0	0	0	0	0	0
Vachellia bravoensis	0	0	0	0	0	1	0	0	0	0	0	0
Vachellia californica	0	0	1	0	0	0	0	0	0	0	0	1
Vachellia cedilloi	0	0	0	0	0	0	0	0	0	0	0	1
Vachellia chiapensis	0	0	0	0	0	0	0	0	0	0	1	1
Vachellia cochliacantha	0	1	0	0	1	0	0	0	0	0	0	0
Vachelllia cookii	0	0	0	0	0	0	0	0	1	0	1	0
Vachellia collinsii	0	0	0	0	0	0	0	0	0	1	1	1
Vachellia constricta	1	0	1	0	1	1	1	0	0	0	0	0
Vachellia cornigera	1	0	0	0	0	1	0	0	1	1	1	1
Vachellia crinita	0	0	1	0	0	0	0	0	0	0	0	0
Vachellia cymbispina	0	0	1	0	0	0	0	0	0	0	0	0
Vachellia farnesiana	1	1	1	1	1	1	1	1	1	0	1	1
Vachellia gentlei	0	0	0	0	0	0	0	0	1	1	1	1
Vachellia glandulifera	0	0	0	0	1	1	0	0	0	0	0	0
Vachellia globulifera	0	0	0	0	0	0	0	0	0	1	1	1
Vachellia hindsii	0	1	0	0	0	0	0	0	0	0	1	0
Vachellia hirtipes	0	0	0	0	0	0	0	0	0	0	1	0
Vachellia interior	0	1	0	0	0	0	0	0	0	0	0	0
Vachellia macracantha	0	1	0	0	0	0	0	0	0	0	0	0
Vachellia mayana	0	0	0	0	0	0	0	0	1	0	1	0
Vachellia occidentalis	0	0	1	0	0	0	0	0	0	0	0	0
Vachellia parvicephala	0	0	0	0	0	0	0	0	0	0	0	1
Vachellia peninsularis	0	0	1	0	0	0	0	0	0	0	0	0
Vachellia pennatula	1	1	1	0	1	1	0	0	0	1	1	1
Vachellia pringlei	0	1	0	0	0	1	0	0	0	1	1	1
Vachellia rigidula	1	0	0	0	0	1	1	0	0	0	0	0
Vachellia schaffneri	1	1	0	1	1	1	0	0	0	0	0	0
Vachellia schotii	0	0	0	0	0	0	1	0	0	0	0	0
Vachellia sphaerocephala	0	1	0	0	0	1	0	0	0	0	0	0
Vachellia tortuosa	0	0	0	0	0	0	1	0	0	0	0	0
Vachellia vernicosa	0	0	0	0	1	1	1	0	0	0	0	0
Vachellia villaregalis	0	1	0	0	0	0	0	0	0	0	0	0
Zapoteca formosa	1	1	0	0	1	1	0	0	0	1	1	1
Zapoteca lambertiana	0	0	0	0	0	1	0	0	0	0	1	0
Zapoteca media	1	1	0	0	1	1	0	0	0	0	0	0
Zapoteca portoricensis	1	0	0	0	0	1	0	0	1	0	1	0
Zapoteca tetragona	0	1	0	0	0	0	0	0	0	0	1	0
Zygia cognata	0	0	0	0	0	0	0	0	0	1	0	0
Zygia conzatii	0	0	0	0	0	0	0	0	1	1	1	0
Zygia englesingii	0	0	0	0	0	0	0	0	0	0	1	0
Zygia latifolia	0	0	0	0	0	0	0	0	0	0	1	1
Zygia peckii	0	0	0	0	0	0	0	0	1	0	1	0
Zygia recordii	0	0	0	0	0	0	0	0	0	0	0	1
Zygia stevensonii	0	0	0	0	0	0	0	0	0	0	0	1

## Sheet: GENERA
	Abarema	Acacia	Acaciella	Albizia	Balizia	Calliandra	Chloroleucon	Cojoba	Desmanthus	Ebenopsis	Entada	Enterolobium	Havardia	Inga	Leucaena	Lysiloma	Mariosousa	Mimosa	Neltuma	Neptunia	Painteria	Piptadenia	Pithecellobium	Samanea	Senegalia	Sphinga	Strombocarpa	Vachellia	Zapoteca	Zygia
Bajio	0	0	1	1	0	1	0	1	1	0	0	1	1	1	1	1	1	1	1	1	1	0	1		1	0	0	1	1	0
Novo Gal	0	1	1	1	0	1	1	0	1	0	1	0	0	1	1	1	1	1	1	1	1	1	1		1	1	0	1	1	0
Des Son	0	0	1	1	0	1	0	0	0	0	0	0	0	0	1	0	0	1	1	0	0	0	0		1	0	1	1	0	0
Vall Mex	0	0	1	0	0	1	0	0	1	0	0	0	0	0	0	0	0	1	1	0	1	0	0		0	0	0	1	0	0
Durango	0	1	1	1	0	1	0	0	1	0	0	1	0	0	1	1	1	1	1	1	0	0	1		1	0	1	1	0	0
NE Mexico	0	0	1	0	0	1	0	0	1	0	0	0	0	0	0	0	0	1	1	0	1	0	0	1	0	0	0	1	0	0
Texas	0	0	1	1	0	1	0	0	1	1	0	0	1	0	1	0	0	1	1	1	0	0	0	1	1	0	1	1	0	0
California	0	1	0	1	0	1	0	0	0	0	0	0	0	0	0	0	0	0	1	0	0	0	0		1	0	1	1	0	0
Tabasco	1	0	1	1	1	1	0	1	1	0	1	1	1	1	0	1	0	1	0	1	0	0	1		1	1	0	1	1	1
Q. Roo	0	0	1	1	0	1	1	1	0	0	0	1	1	0	0	1	0	1	0	0	0	0	1	1	1	1	0	1	1	1
Chiapas	0	0	1	1	0	1	1	1	1	0	1	1	1	1	1	1	1	1	1	1	0	1	1	1	1	1	0	1	1	1
Yucatán	0	0	1	1	1	1	1	1	1	1	0	1	1	1	1	1	1	1	1	1		1	1	1	1	1	0	1	1	1
